# Supplementary material for: Lactate dehydrogenase D is a general dehydrogenase for D-2-hydroxyacids and is associated with D-lactic acidosis
Source: PubMed Central journal article supplement (PMC10589216; doi:10.1038/s41467-023-42456-3), 2023-10-20
Supplement: 41467_2023_42456_MOESM4_ESM.pdf [file 41467_2023_42456_MOESM4_ESM.pdf]

## Description of Additional Supplementary Files

**File Name:** Supplementary Data 1

**Description:** Statistics of diffraction data and structure refinement

Footnotes:

<sup>a</sup> Numbers in parentheses represent the highest resolution shell.

<sup>b</sup>  $R_{\text{merge}} = \frac{\sum_{hkl} \sum_i |I_i(hkl) - \langle I(hkl) \rangle|}{\sum_{hkl} \sum_i I_i(hkl)}$ .

<sup>c</sup>  $R = \frac{\sum_{hkl} ||F_o| - |F_c||}{\sum_{hkl} |F_o|}$ .
